# Supplementary material for: High-frequency repetitive transcranial magnetic stimulation protects against 6-OHDA-induced Parkinson’s disease symptoms by modulating the proNGF-p75NTR-sortilin pathway
Source: PeerJ. 2025 Jul 2;13:e19633. doi: 10.7717/peerj.19633 (PMC12228483; doi:10.7717/peerj.19633)
Supplement: Supplemental Information 1 [file peerj-13-19633-s001.xlsx]

## Sheet: Figure 1
Number of rotations (turns)	6-OHDA 5w	6-OHDA-rTMS 4w
	330	200
	343	210
	309	192
	317	208
	320	176
	294	189
Number of TH-positive neurons in SNpc		con						ipsi
	Sham rTMS	101	103	132	88	98	121	73	68	48	54	58	64
	HF rTMS	93	98	111	71	108	72	62	75	101	74	65	77

## Sheet: Figure 2
Sham rTMS sortilin	Con	Ipsi
	1	1.0975
	0.873547	1.20181
	0.92731	1.06217
	1	1.1089
	0.82341	1.00675
HF rTMS sortilin	Con	Ipsi
	1	1.00654
	0.733614	0.800454
	1	0.959042
	0.87695	0.76854
	0.91649	0.934216

## Sheet: Figure 3
Sham rTMS p75 NTR	Con	Ipsi
	1	1.33728
	1.14119	1.42785
	1.35271	2.37483
	1.26188	1.48889
	0.976854	1.48625
HF rTMS p75 NTR	Con	Ipsi
	0.983454	0.967622
	0.681835	0.756374
	1	0.60858
	0.976854	0.768539
	0.889543	0.897643

## Sheet: Figure 4
Sham rTMS pro NGF	Con	Ipsi
	1	1.9483
	1.10136	1.36387
	1.32821	1.61241
	0.71649	1.23422
	0.97964	1.58324
HF rTMS pro NGF	Con	Ipsi
	0.857035	0.796952
	1.04809	0.916976
	1.12377	1.16936
	0.83743	0.796534
	0.76473	1.07658
Sham rTMS pro BDNF	Con	Ipsi
	0.89956	1.04553
	1	1.31551
	0.87956	1.26473
HF rTMS pro BDNF	Con	Ipsi
	0.916976	1.20704
	1	1.08698
	0.733614	1.3457
